# Supplementary material
Source: PubMed Central journal article supplement (PMC3269153)
Supplement: supp_R021089_jlr.R021089-1.pdf [file supp_R021089_jlr.R021089-1.pdf]

**Table S1. Surface marker expression in BM MSCs, SVCs, ASCs, committed preadipocytes and mature adipocytes.**

|                                                        | Marker                                                 |                                                       | BM MSCs                           | MSCs<br>(ISCT criteria)               | SVCs<br>(unsorted)                                                           | ASCs                                                                                                         | Committed Preadipocytes                                               | Adipocytes     | Marker expression pattern                                                  |
|--------------------------------------------------------|--------------------------------------------------------|-------------------------------------------------------|-----------------------------------|---------------------------------------|------------------------------------------------------------------------------|--------------------------------------------------------------------------------------------------------------|-----------------------------------------------------------------------|----------------|----------------------------------------------------------------------------|
|                                                        | Common name                                            | Gene name or description                              |                                   |                                       |                                                                              |                                                                                                              |                                                                       |                |                                                                            |
|                                                        | CD166                                                  | ALCAM                                                 | (72, 172)                         |                                       | (103)                                                                        | (21, 86, 103, 152, 172, 245)                                                                                 |                                                                       |                | Different between SVCs and ASCs                                            |
|                                                        | CD45                                                   | PTPRC; protein tyrosine phosphatase, receptor type C  | (72, 81, 111, 119, 159, 172, 252) | (116)                                 | (47, 49, 109, 158)                                                           | (21, 47, 81, 86, 96, 98, 109, 111, 120, 130, 145, 152, 170, 172, 245)                                        | (24, 189)                                                             |                |                                                                            |
|                                                        | vWF                                                    | von Willebrand factor                                 | (72)                              |                                       | (105)                                                                        | (47, 103, 121)                                                                                               |                                                                       |                |                                                                            |
| Enriched in adipogenic ASCs or committed preadipocytes | Lin                                                    | CD2, CD3, CD4, CD5, CD6, NK1.1, B220, Ter-119 and Gr- |                                   |                                       | (158, 189)                                                                   | (98)                                                                                                         | (189)                                                                 |                | Different between SVCs and ASCs (but some inconsistent reports)            |
|                                                        | CD31                                                   | PECAM-1                                               | (72, 81, 111, 119, 172, 252)      |                                       | (22, 47, 49, 103, 106, 107, 124, 161)<br>(109)                               | (103)<br>(172)<br>(21, 22, 47, 81, 86, 98, 109, 111, 120, 121, 124, 245)                                     | (161, 189)                                                            | (106, 161)     |                                                                            |
|                                                        | CD34                                                   | CD34; Stem cell marker; CD62L receptor                | (72, 81, 119, 159, 172, 252)      | (116)                                 | (22, 47, 49, 97, 103, 104, 106, 107, 109, 118, 124, 158, 159, 161, 163, 189) | (22, 86, 103, 109, 118, 124, 163, 172, 189, 245)<br>(47, 81, 91, 98, 120, 121, 130, 145, 147, 152, 170, 244) | (24, 161, 189)                                                        | (106, 161)     |                                                                            |
|                                                        | CD117                                                  | c-kit; SCFR                                           | (172, 252)                        |                                       | (163)<br>(108)                                                               | (105)<br>(172)<br>(98, 147, 170)                                                                             | (189)                                                                 |                |                                                                            |
|                                                        | CD11a                                                  | Integrin αL; LFA-1                                    | (72)                              |                                       | (47)<br>(108)                                                                | (86)                                                                                                         |                                                                       |                |                                                                            |
|                                                        | CD14                                                   | LPS-R                                                 | (72, 119, 159, 172)               | (116)                                 | (47, 161)<br>(106, 109, 244)                                                 | (21, 81, 86, 109)<br>(172)                                                                                   | (161)                                                                 | (106, 161)     |                                                                            |
|                                                        | CD15                                                   | LewisX; SSEA-1                                        | (72)                              |                                       | (106)                                                                        | (147)<br>(23)                                                                                                |                                                                       | (106)          |                                                                            |
|                                                        | CD73                                                   | NT5E; SH3                                             | (72, 81, 111, 119, 172)           | (116)                                 | (103, 159, 244)                                                              | (81, 103, 111, 130, 145, 170, 172)<br>(105)                                                                  |                                                                       |                |                                                                            |
|                                                        | CD133                                                  | AC133                                                 |                                   |                                       | (98)<br>(108)                                                                | (105, 147, 170)                                                                                              |                                                                       |                |                                                                            |
|                                                        | CD144                                                  | VE-cadherin                                           |                                   |                                       | (22, 109)<br>(103)                                                           | (22, 103, 109, 120, 121, 170)                                                                                |                                                                       |                |                                                                            |
|                                                        | CD146                                                  | MCAM (melanoma cell adhesion molecule)                |                                   |                                       | (103, 124)                                                                   | (21, 86, 121)<br>(120, 124, 245)                                                                             |                                                                       |                |                                                                            |
|                                                        | SMA                                                    | Smooth muscle actin                                   |                                   |                                       | (78, 121)                                                                    | (22, 25, 121)<br>(117)                                                                                       | (24, 25)                                                              |                |                                                                            |
|                                                        | ABCG2                                                  | ABCG2                                                 |                                   |                                       | (97, 103)<br>(108)                                                           | (103)                                                                                                        |                                                                       |                |                                                                            |
|                                                        | Enriched in adipogenic ASCs or committed preadipocytes | CD105                                                 | Endoglin; SH2                     | (72, 81, 92, 111, 119, 159, 172, 252) | (116)                                                                        | (103, 107, 108, 159, 163, 244)                                                                               | (21, 81, 86, 92, 103, 105, 111, 130, 147, 152, 170, 172, 245)<br>(49) | (24, 161, 189) |                                                                            |
| CD140a                                                 |                                                        | PDGFR-α                                               |                                   |                                       | (108)                                                                        | (22)                                                                                                         | (196)                                                                 |                |                                                                            |
| CD24                                                   |                                                        | BA-1 (binds P-selectin)                               |                                   |                                       | (189) (may be very low % of total)                                           |                                                                                                              | (189)                                                                 |                |                                                                            |
| Enriched in adipogenic ASCs or committed               | CD62L                                                  | L-selectin; LECAM-1                                   | (72)                              |                                       | (108)                                                                        |                                                                                                              |                                                                       |                | Different between BM MSCs and SVCs or ASCs (but some inconsistent reports) |
|                                                        | CD104                                                  | β4-integrin                                           | (72)                              |                                       |                                                                              | (81)                                                                                                         |                                                                       |                |                                                                            |
|                                                        | CD106                                                  | VCAM-1                                                | (72, 81, 172)                     |                                       | (108, 244)                                                                   | 172<br>(81, 245)                                                                                             |                                                                       |                |                                                                            |
|                                                        | CD49d                                                  | α4-integrin; VLA-4                                    | (172)<br>(72, 81)                 |                                       | (108)                                                                        | (81, 170, 172)                                                                                               |                                                                       |                |                                                                            |
|                                                        | Stro-1                                                 |                                                       | (81, 254)                         |                                       |                                                                              | (21, 81, 88)<br>(86, 147)                                                                                    |                                                                       |                |                                                                            |
| Enriched in adipogenic ASCs or committed               | CD29                                                   | β1-integrin                                           | (72, 81, 92, 172, 252)            |                                       | (103, 108, 189, 244)                                                         | (81, 86, 92, 96, 103, 120, 152, 170, 172)                                                                    | (189)                                                                 |                |                                                                            |
|                                                        | CD140b                                                 | PDGFR-β                                               |                                   |                                       |                                                                              | (22, 121)                                                                                                    | (24)                                                                  |                |                                                                            |
|                                                        | Sca-1                                                  | Ly-6A.2                                               | (252)                             |                                       | (104, 135, 158)                                                              | (98, 120)                                                                                                    | (24, 189)                                                             |                |                                                                            |
|                                                        | CD9                                                    | p24; MRP-1                                            | (72)                              |                                       |                                                                              | (86)                                                                                                         |                                                                       |                |                                                                            |
|                                                        | CD10                                                   | MME; neprilysin                                       | (159, 172)                        |                                       | (47, 106)                                                                    | (22, 47, 86, 96, 170, 172)                                                                                   |                                                                       | (106)          |                                                                            |
|                                                        | CD13                                                   | Aminopeptidase N; APN                                 | (159, 172)                        |                                       | (47, 103, 106, 109, 159)                                                     | (22, 47, 81, 86, 96, 103, 109, 145, 147, 152, 170, 172)                                                      |                                                                       | (106)          |                                                                            |

|                 |                                            |                             |       |                                        |                                                                            |       |                                      |
|-----------------|--------------------------------------------|-----------------------------|-------|----------------------------------------|----------------------------------------------------------------------------|-------|--------------------------------------|
| <i>CD36</i>     | CD36; FAT; GPIV                            |                             |       | (106)                                  |                                                                            | (106) | No differences across all cell types |
| <i>CD44</i>     | CD44; H-CAM; Pgp-1                         | (72, 81, 92, 159, 172, 252) |       | (47, 103, 159, 163, 244)               | (21, 47, 81, 86, 92, 96, 98, 103, 120, 145, 147, 152, 170, 172)            |       |                                      |
| <i>CD49a</i>    | $\alpha$ 1-integrin; VLA-1                 | (72)                        |       | (103)                                  | (103, 170)                                                                 |       |                                      |
| <i>CD49b</i>    | $\alpha$ 2-integrin; VLA-2                 | (72)                        |       | (108)                                  | (147)                                                                      |       |                                      |
| <i>CD49e</i>    | $\alpha$ 5-integrin; VLA-5                 | (72)                        |       | (108)                                  | (86, 96)                                                                   |       |                                      |
| <i>CD51</i>     | $\alpha$ V-integrin (vitronectin receptor) | (72)                        |       | (108)                                  |                                                                            |       |                                      |
| <i>CD54</i>     | ICAM-1                                     | (72)                        |       | (163)                                  | (86, 245)                                                                  |       |                                      |
| <i>CD55</i>     | DAF                                        |                             |       | (106)                                  | (86, 111)                                                                  | (106) |                                      |
| <i>CD59</i>     | Protectin                                  | (172)                       |       | (106)                                  | (86, 96, 170, 172)                                                         | (106) |                                      |
| <i>CD61</i>     | $\beta$ 3-integrin                         | (72)                        |       | (108)                                  |                                                                            |       |                                      |
| <i>CD63</i>     | CD63; Tspan30                              |                             |       | (103)                                  | (103)                                                                      |       |                                      |
| <i>CD65</i>     | VIM-2                                      |                             |       | (106)                                  |                                                                            | (106) |                                      |
| <i>CD71</i>     | TFRC (transferrin receptor)                | (72, 81, 172)               |       |                                        | (81, 172)                                                                  |       |                                      |
| <i>CD90</i>     | (Thy-1)                                    | (72, 81, 92, 111, 159, 172) | (116) | (47, 49, 103, 107, 108, 159, 163, 244) | (21, 22, 47, 81, 92, 96, 103, 105, 111, 124, 130, 147, 163, 170, 172, 245) | (163) |                                      |
| <i>CD120a</i>   | TNFR-I                                     | (72, 172)                   |       |                                        | (172)                                                                      | (253) |                                      |
| <i>CD124</i>    | IL-4R                                      | (72, 172)                   |       |                                        | (172)                                                                      |       |                                      |
| <i>CD271</i>    | L-NGFR                                     |                             |       | (118)                                  | (118)                                                                      |       |                                      |
| <i>3G5</i>      |                                            |                             |       | (21)                                   | (21)                                                                       |       |                                      |
| <i>HLA-ABC</i>  |                                            | (159)                       |       | (108, 109, 159)                        | (86, 96, 109, 145, 245)                                                    |       |                                      |
| <i>NG2</i>      | chondroitin sulfate proteoglycan           |                             |       |                                        | (22, 121)                                                                  | (24)  |                                      |
| <i>CD3</i>      | T3                                         |                             |       | (47)                                   |                                                                            | (106) |                                      |
| <i>CD4</i>      | MHC class II co-receptor: T4               | (72)                        |       | (106, 108)                             |                                                                            | (106) |                                      |
| <i>CD5</i>      | CD5; Ly-1                                  |                             |       | (106)                                  |                                                                            | (106) |                                      |
| <i>CD8a</i>     | MHC I co-receptor: T8                      |                             |       | (106, 108)                             |                                                                            | (106) |                                      |
| <i>CD11b</i>    | Integrin $\alpha$ M; Mac-1                 | (172)                       | (116) | (108)                                  | (86, 96, 98, 172)                                                          | (24)  |                                      |
| <i>CD11c</i>    | Integrin $\alpha$ X; p150; CR4             |                             |       | (108)                                  | (86)                                                                       |       |                                      |
| <i>CD18</i>     | $\beta$ 2-integrin                         | (72)                        |       | (108)                                  | (86)                                                                       |       |                                      |
| <i>CD19</i>     | B4                                         |                             | (116) | (106)                                  |                                                                            | (106) |                                      |
| <i>CD20</i>     | Ms4a1; Ly-44                               |                             |       | (106)                                  |                                                                            | (106) |                                      |
| <i>CD38</i>     | T10; cyclic ADP ribose hydrolase           |                             |       | (106)                                  |                                                                            | (106) |                                      |
| <i>CD48</i>     | Blast-1                                    | (172)                       |       |                                        | (172)                                                                      |       |                                      |
| <i>CD50</i>     | ICAM-3                                     | (72)                        |       |                                        | (86)                                                                       |       |                                      |
| <i>CD56</i>     | NCAM                                       | (119)                       |       |                                        | (81, 86, 145)                                                              |       |                                      |
| <i>CD62E</i>    | E-selectin; ELAM-1                         | (72)                        |       |                                        | (81, 86)                                                                   |       |                                      |
| <i>CD62P</i>    | P-selectin; PADGEM                         | (72)                        |       | (108)                                  |                                                                            |       |                                      |
| <i>CD135</i>    | Flt3/Fli2                                  | (172)                       |       |                                        | (172)                                                                      |       |                                      |
| <i>HLA-DR</i>   |                                            | (111, 159)                  | (116) | (108, 159)                             | (86, 92, 96, 111, 145, 152, 245)                                           |       |                                      |
| <i>CD2</i>      | CD58 ligand; LFA-2                         |                             |       | (47)                                   |                                                                            |       |                                      |
| <i>CD49c</i>    | $\alpha$ 3-integrin; VLA-3                 | (72)                        |       |                                        |                                                                            |       |                                      |
| <i>CD58</i>     | LFA-3                                      | (72)                        |       |                                        |                                                                            |       |                                      |
| <i>CD102</i>    | ICAM-2                                     | (72)                        |       |                                        |                                                                            |       |                                      |
| <i>CD138</i>    | Syndecan-1                                 |                             |       | (108)                                  |                                                                            |       |                                      |
| <i>vimentin</i> | Vim                                        |                             |       |                                        | (47)                                                                       |       |                                      |
| <i>CD184</i>    | CXCR4                                      |                             |       |                                        | (145)                                                                      |       |                                      |
| <i>CD243</i>    | MDR-1; p170; P-gp                          |                             |       | (108)                                  |                                                                            |       |                                      |
| <i>Fli-1</i>    | Fli-1                                      |                             |       |                                        | (120, 147)                                                                 |       |                                      |
| <i>Ter-119</i>  | Ter-119                                    |                             |       |                                        |                                                                            | (24)  |                                      |
| <i>CD16</i>     | Fc gamma RIIIA                             |                             |       |                                        | (81)                                                                       |       |                                      |
| <i>CD25</i>     | IL-2R                                      | (72)                        |       |                                        |                                                                            |       |                                      |
| <i>CD41a</i>    | gpIIb                                      |                             |       | (108)                                  |                                                                            |       |                                      |
| <i>CD49f</i>    | $\alpha$ 6-integrin; VLA-6                 |                             |       | (108)                                  |                                                                            |       |                                      |
| <i>CD79</i>     | Component of BCR                           |                             | (116) |                                        |                                                                            |       |                                      |

**Table S1. Surface marker expression in BM MSCs, SVCs, ASCs, committed preadipocytes and mature adipocytes.** Studies reporting positive expression are shown in red; those reporting negative expression are shown in green; and those reporting mixed results are shown in amber. Studies using cells isolated from mice or rats are shown underlined; all other studies used cells isolated from human tissues. Markers are grouped into common expression patterns, as indicated in the right hand column. Positive or negative expression of some markers is distinctive of more adipogenic ASCs, or of committed preadipocytes, as indicated on the left hand side. In some studies it is not clear whether the 'ASCs' studied are SVC subpopulations or whole, unsorted SVCs; however, we have tried to distinguish between these two cell populations for each study cited. It should also be noted that much more is likely known about surface marker expression in mature adipocytes; however, we have not included such studies here as this is beyond the scope of the present review. ISCT, International Society for Cellular Therapy.
